# Supplementary material for: Increased Stromal Infiltrating Lymphocytes Are Associated with the Risk of Disease Progression in Mesenchymal Circulating Tumor Cell-Positive Primary Breast Cancer Patients
Source: PubMed Central journal article supplement (PMC7763628; doi:10.3390/ijms21249460), 2020-12-12
Supplement: ijms-21-09460-s001.pdf [file ijms-21-09460-s001.pdf]

## Supplementary material

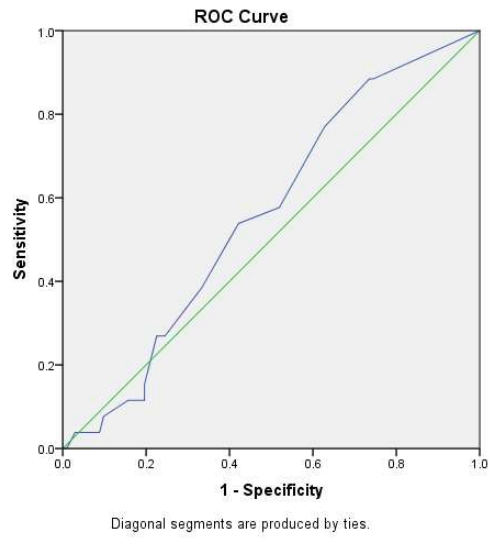

**FigureS1a.** ROC curve for CD3, AUC value is shown in the table below

| Area Under the Curve         |                         |                              |                                    |             |
|------------------------------|-------------------------|------------------------------|------------------------------------|-------------|
| Test Result Variable(s): CD3 |                         |                              |                                    |             |
| Area                         | Std. Error <sup>a</sup> | Asymptotic Sig. <sup>b</sup> | Asymptotic 95% Confidence Interval |             |
|                              |                         |                              | Lower Bound                        | Upper Bound |
| 0.560                        | 0.058                   | 0.348                        | 0.446                              | 0.674       |

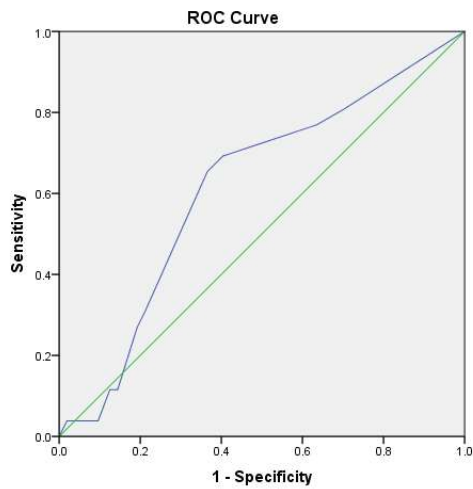

Diagonal segments are produced by ties.

**Figure S1b.** ROC curve for CD8, AUC value is shown in the table below

**Area Under the Curve**

Test Result Variable(s): CD8

| Area  | Std. Error <sup>a</sup> | Asymptotic Sig. <sup>b</sup> | Asymptotic 95% Confidence Interval |             |
|-------|-------------------------|------------------------------|------------------------------------|-------------|
|       |                         |                              | Lower Bound                        | Upper Bound |
| 0.614 | 0.061                   | 0.074                        | 0.495                              | 0.732       |

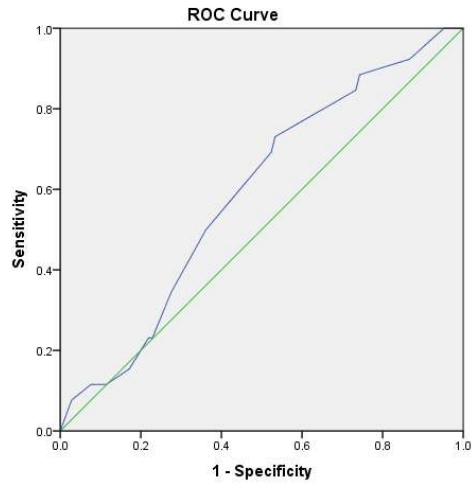

Diagonal segments are produced by ties.

**Figure S1c.** ROC curve for CD45RO, AUC value is shown in the table below

**Area Under the Curve**

Test Result Variable(s): CD45RO

| Area  | Std. Error <sup>a</sup> | Asymptotic Sig. <sup>b</sup> | Asymptotic 95% Confidence Interval |             |
|-------|-------------------------|------------------------------|------------------------------------|-------------|
|       |                         |                              | Lower Bound                        | Upper Bound |
| 0.590 | 0.059                   | 0.155                        | 0.475                              | 0.705       |

**Table S1.** Univariate Cox logistic regression analysis for individual clinical variables

| <b>Variables</b>       | <b>HR (95%CI)</b><br>(n=264*) | <b>P</b>         |
|------------------------|-------------------------------|------------------|
| Age (years)            | 1.632 (0.77-3.47)             | 0.203            |
| T-stage                | 1.752 (1.00-3.06)             | <b>0.049</b>     |
| Histology              | 0.263 (0.06-1.08)             | 0.064            |
| Grade                  | 2.621 (1.50-4.60)             | <b>0.001</b>     |
| N stage                | 2.212 (1.27-3.85)             | <b>0.005</b>     |
| LVI                    | 2.105 (1.10-4.02)             | 0.024            |
| HR status <sup>§</sup> | 2.726 (1.43-5.21)             | <b>0.002</b>     |
| HER2 status            | 2.708 (1.46-5.01)             | <b>0.002</b>     |
| p53                    | 0.814 (0.46-1.46)             | 0.490            |
| bcl2                   | 0.520 (0.30-0.91)             | 0.022            |
| Ki-67 <sup>&amp;</sup> | 3.617 (2.05-6.39)             | <b>&lt;0.001</b> |
| Tumor subtypes         |                               |                  |
| Luminal A              | 1                             |                  |
| Luminal B              | 2.311 (1.10-4.86)             | <b>0.027</b>     |
| HER2 positive          | 4.380 (2.11-9.08)             | <b>&lt;0.001</b> |
| Triple-negative        | 3.955 (1.73-9.04)             | <b>0.001</b>     |

\*Only patients without missing survival data were included

**Table S2.** Univariate Cox logistic regression analysis for individual studied TILs and PFS, cut-off values were defined based on the results of AUC analysis

|            | <b>B</b> | <b>SE</b> | <b>Wald</b> | <b>df</b> | <b>Sig.</b>  | <b>Exp(B)</b> | <b>95.0% CI for Exp(B)</b> |              |
|------------|----------|-----------|-------------|-----------|--------------|---------------|----------------------------|--------------|
|            |          |           |             |           |              |               | <b>Lower</b>               | <b>Upper</b> |
| CD3>6%     | 0.169    | 0.294     | 0.331       | 1         | 0.565        | 1.184         | 0.666                      | 2.105        |
| CD8>6%     | 0.606    | 0.295     | 4.214       | 1         | <b>0.040</b> | 1.833         | 1.028                      | 3.270        |
| CD45>12.5% | 0.769    | 0.336     | 5.247       | 1         | <b>0.022</b> | 2.159         | 1.117                      | 4.169        |

**Table S3.** Univariate Cox logistic regression analysis for studied TILs, stratified by clinicopathological categories and PFS

| Variables              | Categories           | N<br>(n=282) | CD3 <sup>high</sup>   |      | CD8 <sup>high</sup>   |             | CD45RO <sup>high</sup> |             |
|------------------------|----------------------|--------------|-----------------------|------|-----------------------|-------------|------------------------|-------------|
|                        |                      |              | HR (95%CI)<br>(n=242) | P    | HR (95%CI)<br>(n=261) | P           | HR (95%CI)<br>(n=265)  | P           |
| Age<br>(years)         | ≤ 50                 | 67           | 0.79<br>(0.20-3.15)   | 0.73 | 1.98<br>(0.47-8.30)   | 0.35        | 2.00<br>(0.40-9.93)    | 0.40        |
|                        | > 50                 | 214          | 1.29<br>(0.68-2.42)   | 0.44 | 1.83<br>(0.97-0.44)   | 0.06        | 2.23<br>(1.08-0.58)    | <b>0.03</b> |
| T-stage                | T1                   | 186          | 1.20<br>(0.55-2.59)   | 0.65 | 2.36<br>(1.09-5.12)   | <b>0.03</b> | 2.81<br>(1.13-7.01)    | <b>0.03</b> |
|                        | T2 and more          | 85           | 1.08<br>(0.46-2.57)   | 0.86 | 1.20<br>(0.50-2.90)   | 0.68        | 1.39<br>(0.53-3.61)    | 0.51        |
| Histology              | IDC                  | 237          | 1.10<br>(0.61-1.98)   | 0.76 | 1.74<br>(0.96-3.14)   | 0.07        | 2.18<br>(1.10-4.31)    | <b>0.03</b> |
|                        | Others               | 36           | 1.61<br>(0.10-25.89)  | 0.73 | 1.85<br>(0.12-29.79)  | 0.66        | 1.03<br>(0.06-16.55)   | 0.98        |
| Grade                  | Low and intermediate | 174          | 0.94<br>(0.38-2.29)   | 0.89 | 2.63<br>(1.09-6.35)   | <b>0.03</b> | 1.78<br>(0.70-4.52)    | 0.23        |
|                        | High                 | 99           | 0.89<br>(0.39-2.08)   | 0.80 | 0.13<br>(1.00-0.71)   | 0.71        | 2.17<br>(0.75-6.30)    | 0.15        |
| N stage                | N0                   | 185          | 0.76<br>(0.32-1.80)   | 0.53 | 1.95<br>(0.84-4.50)   | 0.12        | 1.90<br>(0.77-4.66)    | 0.16        |
|                        | N+                   | 94           | 1.53<br>(0.67-3.46)   | 0.31 | 1.58<br>(0.70-3.56)   | 0.27        | 1.99<br>(0.74-5.38)    | 0.17        |
| LVI                    | Absent               | 177          | 1.02<br>(0.45-2.32)   | 0.96 | 2.12<br>(0.92-4.89)   | 0.08        | 1.87<br>(0.76-4.58)    | 0.17        |
|                        | Present              | 103          | 1.24<br>(0.38-4.02)   | 0.73 | 1.72<br>(0.54-5.50)   | 0.36        | 1.97<br>(0.54-7.18)    | 0.30        |
| HR status <sup>§</sup> | Negative             | 40           | 0.55<br>(0.16-1.90)   | 0.35 | 0.56<br>(0.16-1.93)   | 0.36        | 1.20<br>(0.26-5.59)    | 0.82        |
|                        | Positive             | 241          | 1.21<br>(0.63-2.33)   | 0.57 | 2.04<br>(1.06-3.94)   | <b>0.03</b> | 2.13<br>(1.02-4.43)    | <b>0.04</b> |
| HER2 status            | Negative             | 238          | 1.36<br>(0.69-2.68)   | 0.37 | 1.82<br>(0.94-3.53)   | 0.08        | 2.07<br>(0.99-4.32)    | 0.05        |
|                        | Amplified            | 43           | 0.49<br>(0.16-1.46)   | 0.20 | 1.30<br>(0.39-4.32)   | 0.67        | 1.47<br>(0.32-6.69)    | 0.62        |
| p53                    | Negative             | 177          | 1.57<br>(0.76-3.25)   | 0.23 | 2.07<br>(1.01-4.22)   | <b>0.05</b> | 3.20<br>(1.30-7.86)    | <b>0.01</b> |
|                        | Positive             | 103          | 0.75<br>(0.29-1.94)   | 0.55 | 1.50<br>(0.56-4.07)   | 0.42        | 1.21<br>(0.45-3.28)    | 0.71        |
| bcl2                   | Negative             | 79           | 0.94<br>(0.38-2.34)   | 0.90 | 1.01<br>(0.41-2.51)   | 0.98        | 2.01<br>(0.67-6.06)    | 0.22        |
|                        | Positive             | 202          | 1.24<br>(0.59-2.60)   | 0.57 | 2.37<br>(1.12-5.01)   | <b>0.03</b> | 2.04<br>(0.89-4.66)    | 0.09        |
| Ki-67 <sup>&amp;</sup> | Low                  | 180          | 0.98<br>(0.37-2.56)   | 0.96 | 1.62<br>(0.66-3.98)   | 0.30        | 1.73<br>(0.67-4.47)    | 0.26        |
|                        | High                 | 101          | 0.71<br>(0.34-1.51)   | 0.38 | 1.15<br>(0.53-2.54)   | 0.72        | 1.46<br>(0.55-3.84)    | 0.45        |
| Tumor subtypes         | Luminal A            | 148          | 1.66<br>(0.56-4.93)   | 0.36 | 2.69<br>(0.96-7.55)   | 0.06        | 1.99<br>(0.67-5.95)    | 0.22        |
|                        | Luminal B            | 57           | 0.80<br>(0.25-2.49)   | 0.70 | 1.02<br>(0.33-3.16)   | 0.97        | 1.63<br>(0.43-6.15)    | 0.47        |
|                        | HER2 positive        | 43           | 0.49<br>(0.16-1.46)   | 0.20 | 1.30<br>(0.39-4.32)   | 0.67        | 1.47<br>(0.32-6.69)    | 0.62        |
|                        | Triple-negative      | 33           | 0.69<br>(0.17-2.77)   | 0.60 | 0.61<br>(0.15-2.43)   | 0.48        | 1.15<br>(0.24-5.59)    | 0.86        |

The total number of samples analyzed in the study was n = 282; only cases with valid information on individual variables were included in the table; <sup>§</sup> negative for both or positive for either with cut-off 1%; <sup>&</sup>cut-off 20%; Abbreviations: IDC, Invasive ductal carcinoma; LVI, Lymphovascular invasion; HR, Hormonal receptor

**Table S4.** qRT-PCR results for control samples

| <b>nb</b> | <b>GAPD<br/>H (Ct)</b> | <b>SNAI1<br/>(Ct)</b> | <b>SNAI1<br/>relative<br/>expression</b> | <b>SNAI2<br/>(Ct)</b> | <b>SNAI2<br/>relative<br/>expression</b> | <b>TWIST<br/>1 (Ct)</b> | <b>TWIST1<br/>relative<br/>expression</b> | <b>ZEB1<br/>(Ct)</b> | <b>ZEB1<br/>relative<br/>expression</b> |
|-----------|------------------------|-----------------------|------------------------------------------|-----------------------|------------------------------------------|-------------------------|-------------------------------------------|----------------------|-----------------------------------------|
| 1         | 23.11                  |                       |                                          | 0                     | 0.0000                                   | 37.59                   | 0.0000                                    |                      |                                         |
| 2         | 25.92                  | 35.63                 | 0.0012                                   | 0.00                  | 0.0000                                   |                         |                                           | 30.86                | 0.0327                                  |
| 3         | 28.64                  |                       |                                          | 0.00                  | 0.0000                                   | 0.00                    | 0.0000                                    | 33.31                | 0.0394                                  |
| 4         | 28.21                  | 38.43                 | 0.0008                                   | 0.00                  | 0.0000                                   | 0                       | 0.0000                                    | 32.80                | 0.0415                                  |
| 5         | 23.07                  | 29.325                | 0.0131                                   | 0                     | 0.0000                                   |                         |                                           | 30.59                | 0.0054                                  |
| 6         | 22.91                  | 31.605                | 0.0024                                   |                       |                                          | 35.795                  | 0.0001                                    | 29.955               | 0.0076                                  |
| 7         | 24.90                  |                       |                                          | 0                     | 0.0000                                   | 0                       | 0.0000                                    |                      |                                         |
| 8         | 21.84                  | 30.38                 | 0.0027                                   | 0.00                  | 0.0000                                   | 36.51                   | 0.0000                                    | 29.07                | 0.0067                                  |
| 9         | 26.455                 | 37.41                 | 0.0005                                   | 0                     | 0.0000                                   | 0                       | 0.0000                                    | 32.08                | 0.0203                                  |
| 10        | 23.945                 | 31.595                | 0.0050                                   | 0                     | 0.0000                                   | 38.43                   | 0.0000                                    | 31.47                | 0.0054                                  |
| 11        | 28.20                  | 35.62                 | 0.0059                                   | 0.00                  | 0.0000                                   | 0.00                    | 0.0000                                    | 31.61                | 0.0941                                  |
| 12        | 27.24                  | 34.68                 | 0.0058                                   | 0.00                  | 0.0000                                   | 0.00                    | 0.0000                                    | 30.65                | 0.0944                                  |
| 13        | 24.575                 | 32.525                | 0.0040                                   | 0                     | 0.0000                                   |                         |                                           | 31.07                | 0.0111                                  |
| 14        | 23.465                 | 31.47                 | 0.0039                                   | 0                     | 0.0000                                   |                         |                                           | 30.905               | 0.0058                                  |
| 15        | 27.12                  | 33.68                 | 0.0106                                   | 0.00                  | 0.0000                                   |                         |                                           | 30.96                | 0.0696                                  |
| 16        | 26.42                  | 34.76                 | 0.0031                                   | 0.00                  | 0.0000                                   | 0.00                    | 0.0000                                    | 30.93                | 0.0439                                  |
| 17        | 23                     | 31.225                | 0.0033                                   | 0                     | 0.0000                                   |                         |                                           | 29.905               | 0.0083                                  |
| 18        | 23.63                  |                       |                                          | 0                     | 0.0000                                   | 38.23                   | 0.0000                                    |                      |                                         |
| 19        | 24.7                   | 30.915                | 0.0135                                   | 0                     | 0.0000                                   | 0                       | 0.0000                                    | 30.37                | 0.0196                                  |
| 20        | 27.685                 | 34.22                 | 0.0108                                   | 0                     | 0.0000                                   | 0                       | 0.0000                                    | 31.285               | 0.0825                                  |
| 21        | 23.745                 | 33.83                 | 0.0009                                   | 0                     | 0.0000                                   | 41.36                   | 0.0000                                    | 30.98                | 0.0066                                  |
| 22        | 23.48                  | 33.59                 | 0.0009                                   | 0.00                  | 0.0000                                   | 34.11                   | 0.0006                                    | 31.52                | 0.0038                                  |
| 23        | 25.91                  | 33.98                 | 0.0037                                   | 0.00                  | 0.0000                                   | 0.00                    | 0.0000                                    | 30.60                | 0.0387                                  |
| 24        | 24.665                 | 32.87                 | 0.0034                                   | 0                     | 0.0000                                   |                         |                                           | 30.16                | 0.0222                                  |
| 25        | 23.735                 | 32.715                | 0.0020                                   | 0                     | 0.0000                                   | 0                       | 0.0000                                    | 30.42                | 0.0097                                  |
| 26        | 27.43                  | 35.14                 | 0.0048                                   | 0.00                  | 0.0000                                   | 37.81                   | 0.0008                                    | 32.05                | 0.0408                                  |
| 27        | 24.43                  | 33.07                 | 0.0025                                   | 0.00                  | 0.0000                                   |                         |                                           | 30.12                | 0.0194                                  |
| 28        | 27.065                 | 33.015                | 0.0162                                   | 0                     | 0.0000                                   | 0                       | 0.0000                                    | 31.195               | 0.0571                                  |
| 29        | 21.91                  | 31.06                 | 0.0018                                   | 0                     | 0.0000                                   | 0                       | 0.0000                                    | 30.23                | 0.0031                                  |
| 30        | 22.79                  |                       |                                          | 0                     | 0.0000                                   | 35.96                   | 0.0001                                    |                      |                                         |
| 31        | 22.57                  |                       |                                          | 0                     | 0.0000                                   | 36.61                   | 0.0001                                    |                      |                                         |
| 32        | 24.94                  |                       |                                          | 0                     | 0.0000                                   |                         |                                           | 29.44                | 0.0442                                  |
| 33        | 29.065                 | 38.12                 | 0.0019                                   | 0                     | 0.0000                                   | 0                       | 0.0000                                    | 33.32                | 0.0524                                  |
| 34        | 23.395                 | 32.525                | 0.0018                                   | 0                     | 0.0000                                   | 0                       | 0.0000                                    | 29.675               | 0.0129                                  |
| 35        | 25.00                  | 32.34                 | 0.0062                                   | 0.00                  | 0.0000                                   |                         |                                           | 30.06                | 0.0300                                  |
| 36        | 23.035                 | 31.77                 | 0.0023                                   | 0                     | 0.0000                                   | 0                       | 0.0000                                    | 30.84                | 0.0045                                  |
| 37        | 27.06                  | 35.41                 | 0.0031                                   | 0.00                  | 0.0000                                   | 0.00                    | 0.0000                                    | 31.46                | 0.0472                                  |
| 38        | 29.35                  | 36.00                 | 0.0100                                   | 0.00                  | 0.0000                                   | 0.00                    | 0.0000                                    | 31.93                | 0.1678                                  |
| 39        | 26.61                  |                       |                                          | 0                     | 0.0000                                   | 0                       | 0.0000                                    |                      |                                         |
| 40        | 28.68                  |                       |                                          | 0.00                  | 0.0000                                   | 0                       | 0.0000                                    | 36.19                | 0.0055                                  |
| 41        | 24.30                  | 33.65                 | 0.0015                                   | 0.00                  | 0.0000                                   | 0.00                    | 0.0000                                    | 30.88                | 0.0105                                  |
| 42        | 27.61                  | 35.53                 | 0.0041                                   | 0.00                  | 0.0000                                   | 0                       | 0.0000                                    | 32.58                | 0.0319                                  |
| 43        | 23.41                  |                       |                                          | 0                     | 0.0000                                   | 37.29                   | 0.0001                                    |                      |                                         |
| 44        | 22.765                 | 33.4                  | 0.0006                                   | 0                     | 0.0000                                   | 0                       | 0.0000                                    | 31.305               | 0.0027                                  |

|    |        |        |        |      |        |       |        |        |        |
|----|--------|--------|--------|------|--------|-------|--------|--------|--------|
| 45 | 22.53  | 31.925 | 0.0015 | 0    | 0.0000 | 0     | 0.0000 | 30.42  | 0.0042 |
| 46 | 23.61  | 33.335 | 0.0012 | 0    | 0.0000 | 0     | 0.0000 | 29.63  | 0.0154 |
| 47 | 23.91  | 30.505 | 0.0103 | 0    | 0.0000 | 0     | 0.0000 | 30.515 | 0.0103 |
| 48 | 23.99  |        |        | 0    | 0.0000 | 0     | 0.0000 |        |        |
| 49 | 22.02  | 31.325 | 0.0016 | 0    | 0.0000 |       |        | 30.83  | 0.0022 |
| 50 | 24.21  |        |        | 0    | 0.0000 | 36.18 | 0.0003 |        |        |
| 51 | 24.72  | 35.10  | 0.0008 | 0.00 | 0.0000 | 0     | 0.0000 | 30.17  | 0.0229 |
| 52 | 23.38  |        |        | 0    | 0.0000 | 0     | 0.0000 |        |        |
| 53 | 26.745 | 31.45  | 0.0383 | 0    | 0.0000 |       |        | 30.85  | 0.0581 |
| 54 | 21.615 | 29.375 | 0.0046 |      |        | 38.24 | 0.0000 | 29.525 | 0.0042 |
| 55 | 21.805 | 31.13  | 0.0016 | 0    | 0.0000 |       |        | 30.605 | 0.0022 |
| 56 | 21.975 | 32.16  | 0.0009 |      |        | 0     | 0.0000 | 29.955 | 0.0040 |
| 57 | 23.80  | 32.09  | 0.0032 | 0.00 | 0.0000 | 0.00  | 0.0000 | 30.35  | 0.0106 |
| 58 | 22.735 | 30.095 | 0.0061 | 0    | 0.0000 |       |        | 30.695 | 0.0040 |
| 59 | 27.43  | 34.67  | 0.0066 | 0    | 0.0000 | 0     | 0.0000 | 30.82  | 0.0954 |
| 60 | 24.57  | 32.92  | 0.0031 | 0    | 0.0000 |       |        | 31.62  | 0.0075 |

---



Table S5. qRT-PCR results for patient samples

| nb | GAPDH<br>(Ct) | <i>SNAIL</i><br>(Ct) | <i>SNAIL</i><br>relative<br>expression | CTC<br>EMT | <i>SNAI2</i><br>(Ct) | <i>SNAI2</i><br>relative<br>expression | CTC<br>EMT  | <i>TWIST1</i><br>(Ct) | <i>TWIST1</i><br>relative<br>expression | CTC<br>EMT | <i>ZEB1</i><br>(Ct) | <i>ZEB1</i><br>relative<br>expression | CTC<br>EMT |
|----|---------------|----------------------|----------------------------------------|------------|----------------------|----------------------------------------|-------------|-----------------------|-----------------------------------------|------------|---------------------|---------------------------------------|------------|
| 1  | 26.05         | 33.65                | 0.0051                                 | Fail       | 0.00                 | 0.000000                               | Fail        | 0                     | 0.000000                                | Fail       | 31.28               | 0.026645                              | Fail       |
| 2  | 23.70         | 34.04                | 0.0008                                 | Fail       | 0.00                 | 0.000000                               | Fail        | 35.80                 | 0.000228                                | Fail       | 31.71               | 0.003879                              | Fail       |
| 3  | 23.68         | 34.13                | 0.0007                                 | Fail       | 0                    | 0.000000                               | Fail        | 37.685                | 0.000061                                | Fail       | 31.685              | 0.003893                              | Fail       |
| 4  | 22.43         |                      |                                        |            | 0                    | 0.000000                               | Fail        | 36.17                 | 0.000073                                | Fail       |                     |                                       |            |
| 5  | 23.18         | 31.86                | 0.0024                                 | Fail       | 0.00                 | 0.000000                               | Fail        |                       |                                         |            | 32.68               | 0.001381                              | Fail       |
| 6  | 23.62         |                      |                                        |            | 0                    | 0.000000                               | Fail        | 39.48                 | 0.000017                                | Fail       |                     |                                       |            |
| 7  | 21.69         | 29.18                | 0.0056                                 | Fail       | 0                    | 0.000000                               | Fail        | 0                     | 0.000000                                | Fail       | 31.025              | 0.001548                              | Fail       |
| 8  | 26.34         | 34.905               | 0.0026                                 | Fail       | 0                    | 0.000000                               | Fail        |                       |                                         |            | 31.19               | 0.034674                              | Fail       |
| 9  | 26.03         |                      |                                        |            | 0                    | 0.000000                               | Fail        | 38.51                 | 0.000175                                | Fail       |                     |                                       |            |
| 10 | 22.81         |                      |                                        |            | 0                    | 0.000000                               | Fail        | 36.00                 | 0.000107                                | Fail       |                     |                                       |            |
| 11 | 22.77         |                      |                                        |            | 0                    | 0.000000                               | Fail        | 36.51                 | 0.000073                                | Fail       |                     |                                       |            |
| 12 | 25.22         | 35.60                | 0.0008                                 | Fail       | 0.00                 | 0.000000                               | Fail        | 0                     | 0.000000                                | Fail       | 33.17               | 0.004058                              | Fail       |
| 13 | 25.24         | 34.84                | 0.0013                                 | Fail       | 0.00                 | 0.000000                               | Fail        | 0                     | 0.000000                                | Fail       | 30.16               | 0.032918                              | Fail       |
| 14 | 22.32         |                      |                                        |            | 0                    | 0.000000                               | Fail        | 35.12                 | 0.000139                                | Fail       |                     |                                       |            |
| 15 | 23.67         |                      |                                        |            | 0                    | 0.000000                               | Fail        | 37.34                 | 0.000077                                | Fail       |                     |                                       |            |
| 16 | 23.56         | 31.25                | 0.0048                                 | Fail       | 0.00                 | 0.000000                               | Fail        | 0.00                  | 0.000000                                | Fail       | 32.95               | 0.001490                              | Fail       |
| 17 | 24.25         |                      |                                        |            | 0                    | 0.000000                               | Fail        | 37.59                 | 0.000097                                | Fail       |                     |                                       |            |
| 18 | 21.38         |                      |                                        |            | 39.91                | 0.000003                               | <b>Pass</b> | 33.93                 | 0.000167                                | Fail       |                     |                                       |            |
| 19 | 26.64         | 34.495               | 0.0043                                 | Fail       | 0                    | 0.000000                               | Fail        | 0                     | 0.000000                                | Fail       | 32.265              | 0.020263                              | Fail       |
| 20 |               |                      |                                        |            |                      |                                        |             |                       |                                         |            |                     |                                       |            |
| 21 | 21.33         |                      |                                        |            | 38.95                | 0.000005                               | <b>Pass</b> | 33.99                 | 0.000154                                | Fail       |                     |                                       |            |
| 22 | 22.40         |                      |                                        |            | 38.91                | 0.000011                               | <b>Pass</b> | 36.09                 | 0.000076                                | Fail       |                     |                                       |            |
| 23 | 23.36         |                      |                                        |            | 0                    | 0.000000                               | Fail        |                       |                                         |            |                     |                                       |            |
| 24 | 22.46         |                      |                                        |            | 0                    | 0.000000                               | Fail        | 36.28                 | 0.000069                                | Fail       |                     |                                       |            |
| 25 | 24.50         |                      |                                        |            | 0                    | 0.000000                               | Fail        | 36.04                 | 0.000335                                | Fail       |                     |                                       |            |
| 26 | 26.69         |                      |                                        |            | 0                    | 0.000000                               | Fail        | 0                     | 0.000000                                | Fail       |                     |                                       |            |
| 27 | 24.93         |                      |                                        |            | 0                    | 0.000000                               | Fail        | 36.28                 | 0.000382                                | Fail       |                     |                                       |            |
| 28 | 23.58         | 33.85                | 0.0008                                 | Fail       | 0.00                 | 0.000000                               | Fail        | 35.45                 | 0.000266                                | Fail       | 30.46               | 0.008461                              | Fail       |

|    |        |        |        |      |       |          |      |       |          |      |        |          |      |
|----|--------|--------|--------|------|-------|----------|------|-------|----------|------|--------|----------|------|
| 29 | 22.98  | 31.46  | 0.0028 | Fail | 0.00  | 0.000000 | Fail | 34.32 | 0.000384 | Fail | 29.36  | 0.012007 | Fail |
| 30 | 24.21  |        |        |      | 40.87 | 0.000010 | Pass | 37.87 | 0.000077 | Fail |        |          |      |
| 31 | 22.605 | 31.395 | 0.0023 | Fail | 0     | 0.000000 | Fail |       |          |      | 30.81  | 0.003389 | Fail |
| 32 | 22.76  |        |        |      | 0     | 0.000000 | Fail | 0     | 0.000000 | Fail |        |          |      |
| 33 | 23.38  |        |        |      | 0     | 0.000000 | Fail | 37.81 | 0.000045 | Fail |        |          |      |
| 34 | 23.41  | 32.53  | 0.0018 | Fail | 0     | 0.000000 | Fail |       |          |      | 33.905 | 0.000693 | Fail |
| 35 | 23.79  |        |        |      | 0     | 0.000000 | Fail | 0     | 0.000000 | Fail |        |          |      |
| 36 | 27.075 | 34.215 | 0.0071 | Fail | 0     | 0.000000 | Fail | 0     | 0.000000 | Fail | 31.27  | 0.054598 | Fail |
| 37 | 23.19  |        |        |      | 0     | 0.000000 | Fail | 36.58 | 0.000093 | Fail |        |          |      |
| 38 | 22.65  |        |        |      | 0     | 0.000000 | Fail | 36.76 | 0.000056 | Fail |        |          |      |
| 39 | 22.425 | 31.835 | 0.0015 | Fail | 39.84 | 0.000006 | Pass |       |          |      | 29.865 | 0.005759 | Fail |
| 40 | 23.80  |        |        |      | 0     | 0.000000 | Fail |       |          |      |        |          |      |
| 41 |        |        |        |      |       |          |      |       |          |      |        |          |      |
| 42 | 21.96  |        |        |      | 0     | 0.000000 | Fail | 35.08 | 0.000112 | Fail |        |          |      |
| 43 | 26.215 | 34.765 | 0.0027 | Fail |       |          |      | 0     | 0.000000 | Fail | 29.945 | 0.075363 | Fail |
| 44 | 22.65  |        |        |      | 38.81 | 0.000014 | Pass | 35.66 | 0.000121 | Fail |        |          |      |
| 45 | 23.32  |        |        |      | 0     | 0.000000 | Fail | 0     | 0.000000 | Fail |        |          |      |
| 46 | 22.89  |        |        |      | 41.71 | 0.000002 | Pass | 35.01 | 0.000224 | Fail |        |          |      |
| 47 | 21.24  | 29.03  | 0.0045 | Fail | 0     | 0.000000 | Fail | 37.05 | 0.000017 | Fail | 29.535 | 0.003184 | Fail |
| 48 | 25.03  |        |        |      | 41.15 | 0.000014 | Pass | 36.05 | 0.000479 | Fail |        |          |      |
| 49 | 26.85  |        |        |      | 0     | 0.000000 | Fail | 0     | 0.000000 | Fail |        |          |      |
| 50 | 29.61  |        |        |      | 0     | 0.000000 | Fail | 0     | 0.000000 | Fail |        |          |      |
| 51 | 23.24  |        |        |      | 0     | 0.000000 | Fail | 36.86 | 0.000080 | Fail |        |          |      |
| 52 | 21.99  |        |        |      | 0     | 0.000000 | Fail | 38.66 | 0.000010 | Fail |        |          |      |
| 53 | 22.43  |        |        |      | 0     | 0.000000 | Fail | 0     | 0.000000 | Fail |        |          |      |
| 54 | 23.20  |        |        |      | 0     | 0.000000 | Fail | 35.56 | 0.000191 | Fail |        |          |      |
| 55 | 22.64  |        |        |      | 0     | 0.000000 | Fail | 39.05 | 0.000011 | Fail |        |          |      |
| 56 | 24.57  | 33.56  | 0.0020 | Fail | 0     | 0.000000 | Fail |       |          |      | 34.215 | 0.001249 | Fail |
| 57 | 23.04  |        |        |      | 0     | 0.000000 | Fail | 37.05 | 0.000061 | Fail |        |          |      |
| 58 | 24.04  |        |        |      | 0     | 0.000000 | Fail | 37.12 | 0.000116 | Fail |        |          |      |
| 59 | 23.71  |        |        |      | 0     | 0.000000 | Fail | 37.00 | 0.000100 | Fail |        |          |      |

|    |        |        |        |      |       |          |      |        |          |      |        |          |      |
|----|--------|--------|--------|------|-------|----------|------|--------|----------|------|--------|----------|------|
| 60 | 22.42  |        |        |      | 0     | 0.000000 | Fail | 35.79  | 0.000094 | Fail |        |          |      |
| 61 | 23.97  |        |        |      | 0     | 0.000000 | Fail | 0      | 0.000000 | Fail |        |          |      |
| 62 |        |        |        |      |       |          |      |        |          |      |        |          |      |
| 63 | 24.17  |        |        |      | 0     | 0.000000 | Fail | 37.57  | 0.000093 | Fail |        |          |      |
| 64 | 22.70  |        |        |      | 0     | 0.000000 | Fail | 36.76  | 0.000058 | Fail |        |          |      |
| 65 | 21.31  |        |        |      | 40.32 | 0.000002 | Pass |        |          |      |        |          |      |
| 66 | 23.75  |        |        |      | 0     | 0.000000 | Fail | 0      | 0.000000 | Fail |        |          |      |
| 67 | 23.47  |        |        |      | 0     | 0.000000 | Fail | 36.28  | 0.000139 | Fail |        |          |      |
| 68 | 27.53  |        |        |      | 0     | 0.000000 | Fail | 0      | 0.000000 | Fail |        |          |      |
| 69 | 25.21  |        |        |      | 0     | 0.000000 | Fail | 39.12  | 0.000065 | Fail |        |          |      |
| 70 | 25.31  |        |        |      | 0     | 0.000000 | Fail | 38.55  | 0.000103 | Fail |        |          |      |
| 71 | 24.47  | 34.37  | 0.0011 | Fail | 0.00  | 0.000000 | Fail | 0      | 0.000000 | Fail | 30.85  | 0.012007 | Fail |
| 72 | 25.05  |        |        |      | 0     | 0.000000 | Fail | 36.59  | 0.000337 | Fail |        |          |      |
| 73 | 26.995 | 34.105 | 0.0072 | Fail | 0     | 0.000000 | Fail |        |          |      | 30.965 | 0.063813 | Fail |
| 74 | 23.225 | 31.96  | 0.0023 | Fail | 0     | 0.000000 | Fail | 35.635 | 0.000184 | Fail | 30.555 | 0.006215 | Fail |
| 75 | 23.33  |        |        |      | 0     | 0.000000 | Fail | 37.00  | 0.000077 | Fail |        |          |      |
| 76 | 29.68  |        |        |      | 0     | 0.000000 | Fail | 0      | 0.000000 | Fail |        |          |      |
| 77 | 22.49  |        |        |      | 39.92 | 0.000006 | Pass | 36.14  | 0.000078 | Fail |        |          |      |
| 78 | 23.765 | 30.345 | 0.0105 | Fail | 0     | 0.000000 | Fail |        |          |      | 30.65  | 0.008461 | Fail |
| 79 | 22.08  |        |        |      | 35.39 | 0.000098 | Pass | 38.18  | 0.000014 | Fail |        |          |      |
| 80 | 20.68  |        |        |      | 37.81 | 0.000007 | Pass | 36.34  | 0.000019 | Fail |        |          |      |
| 81 | 24.07  |        |        |      | 0     | 0.000000 | Fail | 35.84  | 0.000285 | Fail |        |          |      |
| 82 | 21.83  |        |        |      | 40.16 | 0.000003 | Pass | 37.19  | 0.000024 | Fail |        |          |      |
| 83 | 24.01  |        |        |      | 37.91 | 0.000066 | Pass | 37.23  | 0.000105 | Fail |        |          |      |
| 84 | 21.995 | 30.635 | 0.0025 | Fail | 0     | 0.000000 | Fail | 37.975 | 0.000015 | Fail | 31.315 | 0.001565 | Fail |
| 85 | 25.39  |        |        |      | 0     | 0.000000 | Fail |        |          |      |        |          |      |
| 86 | 23.51  |        |        |      | 38.92 | 0.000023 | Pass | 37.87  | 0.000048 | Fail |        |          |      |
| 87 |        |        |        |      |       |          |      |        |          |      |        |          |      |
| 88 | 23.32  |        |        |      | 0     | 0.000000 | Fail | 37.71  | 0.000047 | Fail |        |          |      |
| 89 | 21.64  |        |        |      | 0     | 0.000000 | Fail | 35.84  | 0.000053 | Fail |        |          |      |
| 90 | 23.38  |        |        |      | 0     | 0.000000 | Fail | 35.68  | 0.000198 | Fail |        |          |      |

|     |        |        |        |      |       |          |      |        |          |      |        |          |      |
|-----|--------|--------|--------|------|-------|----------|------|--------|----------|------|--------|----------|------|
| 91  | 23.12  |        |        |      | 0     | 0.000000 | Fail | 37.22  | 0.000057 | Fail |        |          |      |
| 92  | 24.94  | 35.76  | 0.0006 | Fail | 0.00  | 0.000000 | Fail | 0      | 0.000000 | Fail | 34.63  | 0.001215 | Fail |
| 93  | 23.23  |        |        |      | 0     | 0.000000 | Fail | 38.55  | 0.000024 | Fail |        |          |      |
| 94  | 23.50  |        |        |      | 38.59 | 0.000029 | Pass | 37.61  | 0.000056 | Fail |        |          |      |
| 95  | 24.16  |        |        |      | 0     | 0.000000 | Fail | 38.52  | 0.000048 | Fail |        |          |      |
| 96  | 22.67  |        |        |      | 0     | 0.000000 | Fail | 37.53  | 0.000034 | Fail |        |          |      |
| 97  | 23.40  | 31.06  | 0.0050 | Fail | 0.00  | 0.000000 | Fail | 0.00   | 0.000000 | Fail | 29.21  | 0.017824 | Fail |
| 98  | 23.03  |        |        |      | 39.27 | 0.000013 | Pass | 35.34  | 0.000196 | Fail |        |          |      |
| 99  | 21.19  |        |        |      | 0     | 0.000000 | Fail | 37.50  | 0.000012 | Fail |        |          |      |
| 100 | 23.94  |        |        |      | 0     | 0.000000 | Fail | 0      | 0.000000 | Fail |        |          |      |
| 101 | 22.64  |        |        |      | 0     | 0.000000 | Fail | 37.83  | 0.000027 | Fail |        |          |      |
| 102 | 22.60  |        |        |      | 0     | 0.000000 | Fail | 36.65  | 0.000059 | Fail |        |          |      |
| 103 | 24.69  |        |        |      | 0     | 0.000000 | Fail | 0      | 0.000000 | Fail |        |          |      |
| 104 | 22.74  |        |        |      | 0     | 0.000000 | Fail | 37.42  | 0.000038 | Fail |        |          |      |
| 105 | 25.14  | 33.89  | 0.0023 | Fail | 0     | 0.000000 | Fail | 0      | 0.000000 | Fail | 33.37  | 0.003331 | Fail |
| 106 | 21.58  |        |        |      | 0     | 0.000000 | Fail | 36.79  | 0.000026 | Fail |        |          |      |
| 107 | 23.51  |        |        |      | 0     | 0.000000 | Fail | 38.21  | 0.000038 | Fail |        |          |      |
| 108 | 25.41  | 33.42  | 0.0039 | Fail | 0.00  | 0.000000 | Fail | 34.83  | 0.001455 | Pass | 30.22  | 0.035649 | Fail |
| 109 | 24.72  | 32.495 | 0.0046 | Fail | 0     | 0.000000 | Fail |        |          |      | 32.595 | 0.004260 | Fail |
| 110 | 26.85  |        |        |      | 0     | 0.000000 | Fail | 38.22  | 0.000377 | Fail |        |          |      |
| 111 | 23.49  |        |        |      | 0     | 0.000000 | Fail | 0      | 0.000000 | Fail |        |          |      |
| 112 | 25.87  | 32.96  | 0.0073 | Fail | 0.00  | 0.000000 | Fail | 0      | 0.000000 | Fail | 30.54  | 0.039418 | Fail |
| 113 | 25.72  |        |        |      | 0     | 0.000000 | Fail | 39.05  | 0.000097 | Fail |        |          |      |
| 114 | 22.105 | 31.065 | 0.0020 | Fail | 0     | 0.000000 | Fail | 36.285 | 0.000054 | Fail | 30.51  | 0.002950 | Fail |
| 115 | 22.67  |        |        |      | 0     | 0.000000 | Fail | 37.97  | 0.000025 | Fail |        |          |      |
| 116 | 22.33  |        |        |      | 0     | 0.000000 | Fail | 35.37  | 0.000118 | Fail |        |          |      |
| 117 | 22.55  |        |        |      | 37.97 | 0.000023 | Pass | 0      | 0.000000 | Fail |        |          |      |
| 118 | 22.84  |        |        |      | 40.81 | 0.000004 | Pass | 37.05  | 0.000053 | Fail |        |          |      |
| 119 | 24.98  |        |        |      | 0     | 0.000000 | Fail | 0      | 0.000000 | Fail |        |          |      |
| 120 | 25.87  |        |        |      | 0     | 0.000000 | Fail | 0      | 0.000000 | Fail |        |          |      |
| 121 | 26.715 | 36.97  | 0.0008 | Fail | 0     | 0.000000 | Fail | 0      | 0.000000 | Fail | 34.685 | 0.003988 | Fail |

|     |       |       |        |      |       |          |             |       |          |             |        |          |      |
|-----|-------|-------|--------|------|-------|----------|-------------|-------|----------|-------------|--------|----------|------|
| 122 | 29.70 |       |        |      | 0     | 0.000000 | Fail        | 38.72 | 0.001926 | <b>Pass</b> |        |          |      |
| 123 | 26.33 |       |        |      | 0     | 0.000000 | Fail        | 0     | 0.000000 | Fail        |        |          |      |
| 124 | 25.58 | 34.44 | 0.0021 | Fail | 0.00  | 0.000000 | Fail        | 0     | 0.000000 | Fail        | 30.73  | 0.028067 | Fail |
| 125 | 22.61 |       |        |      | 0     | 0.000000 | Fail        | 36.27 | 0.000077 | Fail        |        |          |      |
| 126 | 23.62 |       |        |      | 38.84 | 0.000026 | <b>Pass</b> | 37.45 | 0.000069 | Fail        |        |          |      |
| 127 | 25.14 | 33.93 | 0.0023 | Fail | 40.69 | 0.000021 | <b>Pass</b> | 36.26 | 0.000451 | Fail        | 30.96  | 0.017701 | Fail |
| 128 | 23.72 |       |        |      | 0     | 0.000000 | Fail        | 37.58 | 0.000067 | Fail        |        |          |      |
| 129 | 23.69 | 33.56 | 0.0011 | Fail | 0.00  | 0.000000 | Fail        |       |          |             | 32.03  | 0.003086 | Fail |
| 130 | 25.81 |       |        |      | 0     | 0.000000 | Fail        | 40.18 | 0.000047 | Fail        |        |          |      |
| 131 | 26.97 |       |        |      | 0     | 0.000000 | Fail        | 0     | 0.000000 | Fail        |        |          |      |
| 132 | 26.08 |       |        |      | 0     | 0.000000 | Fail        |       |          |             |        |          |      |
| 133 | 26.62 | 33.71 | 0.0073 | Fail | 0     | 0.000000 | Fail        |       |          |             | 29.865 | 0.105477 | Fail |
| 134 | 22.74 |       |        |      | 39.26 | 0.000011 | <b>Pass</b> | 37.53 | 0.000035 | Fail        |        |          |      |
| 135 | 21.15 |       |        |      | 0     | 0.000000 | Fail        | 34.65 | 0.000086 | Fail        |        |          |      |
| 136 | 22.92 |       |        |      | 0     | 0.000000 | Fail        | 36.11 | 0.000106 | Fail        |        |          |      |
| 137 | 23.18 |       |        |      | 0     | 0.000000 | Fail        | 34.16 | 0.000496 | Fail        |        |          |      |
| 138 | 23.65 |       |        |      | 0     | 0.000000 | Fail        | 37.05 | 0.000092 | Fail        |        |          |      |
| 139 | 21.88 | 30.67 | 0.0023 | Fail | 0.00  | 0.000000 | Fail        |       |          |             | 28.01  | 0.014229 | Fail |
| 140 |       |       |        |      |       |          |             |       |          |             |        |          |      |
| 141 | 22.34 |       |        |      | 0     | 0.000000 | Fail        | 36.35 | 0.000060 | Fail        |        |          |      |
| 142 | 22.71 |       |        |      | 39.82 | 0.000007 | <b>Pass</b> | 35.53 | 0.000138 | Fail        |        |          |      |
| 143 | 25.23 |       |        |      | 0     | 0.000000 | Fail        | 37.88 | 0.000155 | Fail        |        |          |      |
| 144 | 22.78 |       |        |      | 37.82 | 0.000030 | <b>Pass</b> | 38.37 | 0.000020 | Fail        |        |          |      |
| 145 | 23.03 |       |        |      | 40.17 | 0.000007 | <b>Pass</b> |       |          |             |        |          |      |
| 146 | 24.66 |       |        |      | 0.00  | 0.000000 | Fail        | 0     | 0.000000 | Fail        |        |          |      |
| 147 | 22.99 |       |        |      | 0     | 0.000000 | Fail        | 37.65 | 0.000039 | Fail        |        |          |      |
| 148 | 24.25 |       |        |      | 0     | 0.000000 | Fail        |       |          |             |        |          |      |
| 149 | 23.01 |       |        |      | 0     | 0.000000 | Fail        | 37.67 | 0.000039 | Fail        |        |          |      |
| 150 | 22.57 |       |        |      | 0     | 0.000000 | Fail        | 0.00  | 0.000000 | Fail        |        |          |      |
| 151 | 23.68 |       |        |      | 38.31 | 0.000039 | <b>Pass</b> | 38.53 | 0.000034 | Fail        |        |          |      |
| 152 | 22.99 |       |        |      | 39.02 | 0.000015 | <b>Pass</b> | 36.49 | 0.000086 | Fail        |        |          |      |

|     |       |        |        |      |       |          |      |        |          |      |        |          |      |
|-----|-------|--------|--------|------|-------|----------|------|--------|----------|------|--------|----------|------|
| 153 | 24.12 |        |        |      | 0     | 0.000000 | Fail | 37.83  | 0.000074 | Fail |        |          |      |
| 154 | 22.23 | 31.455 | 0.0017 | Fail | 0     | 0.000000 | Fail |        |          |      | 29.925 | 0.004826 | Fail |
| 155 | 22.71 |        |        |      | 41.36 | 0.000002 | Pass | 33.66  | 0.000503 | Fail |        |          |      |
| 156 | 24.96 | 30.86  | 0.0168 | Fail | 0.00  | 0.000000 | Fail | 36.23  | 0.000405 | Fail | 30.20  | 0.026461 | Fail |
| 157 | 22.63 |        |        |      | 0     | 0.000000 | Fail |        |          |      |        |          |      |
| 158 | 25.01 |        |        |      | 0     | 0.000000 | Fail |        |          |      |        |          |      |
| 159 | 22.37 |        |        |      | 0     | 0.000000 | Fail | 38.50  | 0.000014 | Fail |        |          |      |
| 160 | 28.65 |        |        |      | 0     | 0.000000 | Fail | 38.51  | 0.001080 | Pass |        |          |      |
| 161 | 22.52 |        |        |      | 0     | 0.000000 | Fail |        |          |      |        |          |      |
| 162 | 24.92 |        |        |      | 0     | 0.000000 | Fail | 37.03  | 0.000226 | Fail |        |          |      |
| 163 | 27.37 |        |        |      | 0     | 0.000000 | Fail | 0      | 0.000000 | Fail |        |          |      |
| 164 | 22.87 |        |        |      | 0     | 0.000000 | Fail | 37.02  | 0.000055 | Fail |        |          |      |
| 165 | 22.92 |        |        |      | 37.37 | 0.000045 | Pass | 38.91  | 0.000015 | Fail |        |          |      |
| 166 | 23.47 | 33.91  | 0.0007 | Fail | 0.00  | 0.000000 | Fail |        |          |      | 32.15  | 0.002438 | Fail |
| 167 |       |        |        |      |       |          |      |        |          |      |        |          |      |
| 168 | 21.46 |        |        |      | 40.48 | 0.000002 | Pass | 34.85  | 0.000093 | Fail |        |          |      |
| 169 |       |        |        |      |       |          |      |        |          |      |        |          |      |
| 170 | 23.10 | 31.07  | 0.0040 | Fail | 40.60 | 0.000005 | Pass | 32.76  | 0.001232 | Pass | 31.21  | 0.003607 | Fail |
| 171 | 23.27 | 32.37  | 0.0018 | Fail | 0.00  | 0.000000 | Fail |        |          |      | 29.12  | 0.017397 | Fail |
| 172 | 23.75 | 32.36  | 0.0026 | Fail | 0.00  | 0.000000 | Fail | 36.93  | 0.000108 | Fail | 28.87  | 0.028756 | Fail |
| 173 | 23.18 |        |        |      | 38.38 | 0.000027 | Pass | 36.51  | 0.000097 | Fail |        |          |      |
| 174 | 22.39 | 31.595 | 0.0017 | Fail | 0     | 0.000000 | Fail | 40.595 | 0.000003 | Fail | 30.47  | 0.003696 | Fail |
| 175 | 22.90 |        |        |      | 0     | 0.000000 | Fail | 37.42  | 0.000042 | Fail |        |          |      |
| 176 | 20.94 |        |        |      | 37.36 | 0.000011 | Pass | 35.67  | 0.000037 | Fail |        |          |      |
| 177 | 27.38 |        |        |      | 0     | 0.000000 | Fail | 0      | 0.000000 | Fail |        |          |      |
| 178 | 23.61 |        |        |      | 0     | 0.000000 | Fail | 36.32  | 0.000149 | Fail |        |          |      |
| 179 | 26.72 |        |        |      | 0     | 0.000000 | Fail | 0      | 0.000000 | Fail |        |          |      |
| 180 | 23.37 |        |        |      | 0     | 0.000000 | Fail | 38.22  | 0.000034 | Fail |        |          |      |
| 181 | 21.62 |        |        |      | 0     | 0.000000 | Fail | 36.07  | 0.000045 | Fail |        |          |      |
| 182 | 21.45 |        |        |      | 38.76 | 0.000006 | Pass | 36.79  | 0.000024 | Fail |        |          |      |
| 183 | 22.25 |        |        |      | 38.91 | 0.000010 | Pass | 34.71  | 0.000177 | Fail |        |          |      |

|     |        |        |        |      |       |          |             |       |          |      |        |          |      |
|-----|--------|--------|--------|------|-------|----------|-------------|-------|----------|------|--------|----------|------|
| 184 | 24.79  | 34.31  | 0.0014 | Fail | 0.00  | 0.000000 | Fail        |       |          |      | 34.07  | 0.001614 | Fail |
| 185 | 23.33  |        |        |      | 40.45 | 0.000007 | <b>Pass</b> |       |          |      |        |          |      |
| 186 | 23.97  |        |        |      | 39.00 | 0.000030 | <b>Pass</b> | 0     | 0.000000 | Fail |        |          |      |
| 187 | 23.08  | 29.765 | 0.0097 | Fail | 0     | 0.000000 | Fail        | 0     | 0.000000 | Fail | 31.42  | 0.003086 | Fail |
| 188 |        |        |        |      |       |          |             |       |          |      |        |          |      |
| 189 | 29.53  |        |        |      | 0     | 0.000000 | Fail        | 0     | 0.000000 | Fail |        |          |      |
| 190 | 23.89  |        |        |      | 0     | 0.000000 | Fail        | 0     | 0.000000 | Fail |        |          |      |
| 191 | 24.74  |        |        |      | 40.59 | 0.000017 | <b>Pass</b> | 40.16 | 0.000023 | Fail |        |          |      |
| 192 | 23.23  |        |        |      | 0     | 0.000000 | Fail        |       |          |      |        |          |      |
| 193 | 27.735 | 35.465 | 0.0047 | Fail | 0     | 0.000000 | Fail        | 0     | 0.000000 | Fail | 33.75  | 0.015463 | Fail |
| 194 | 23.69  |        |        |      | 0     | 0.000000 | Fail        | 36.90 | 0.000105 | Fail |        |          |      |
| 195 |        |        |        |      |       |          |             |       |          |      |        |          |      |
| 196 | 27.49  |        |        |      | 0     | 0.000000 | Fail        | 0     | 0.000000 | Fail |        |          |      |
| 197 | 26.39  |        |        |      | 0     | 0.000000 | Fail        | 0     | 0.000000 | Fail |        |          |      |
| 198 | 22.20  |        |        |      | 0     | 0.000000 | Fail        |       |          |      |        |          |      |
| 199 | 23.76  |        |        |      | 0     | 0.000000 | Fail        | 38.12 | 0.000047 | Fail |        |          |      |
| 200 | 24.275 | 31.85  | 0.0052 | Fail | 0     | 0.000000 | Fail        |       |          |      | 29.375 | 0.029157 | Fail |
| 201 | 23.18  |        |        |      | 0     | 0.000000 | Fail        | 37.17 | 0.000061 | Fail |        |          |      |
| 202 | 22.27  |        |        |      | 0     | 0.000000 | Fail        | 36.78 | 0.000043 | Fail |        |          |      |
| 203 | 28.76  |        |        |      | 0     | 0.000000 | Fail        | 0     | 0.000000 | Fail |        |          |      |
| 204 | 24.42  |        |        |      | 0     | 0.000000 | Fail        | 39.30 | 0.000033 | Fail |        |          |      |
| 205 | 23.50  |        |        |      | 0     | 0.000000 | Fail        | 37.40 | 0.000065 | Fail |        |          |      |
| 206 | 23.81  | 32.345 | 0.0027 | Fail | 0     | 0.000000 | Fail        | 0     | 0.000000 | Fail | 31.25  | 0.005759 | Fail |
| 207 | 24.97  | 36.97  | 0.0002 | Fail | 0.00  | 0.000000 | Fail        |       |          |      | 34.12  | 0.001760 | Fail |
| 208 | 21.86  | 30.325 | 0.0028 | Fail | 42    | 0.000001 | <b>Pass</b> | 0     | 0.000000 | Fail | 30.21  | 0.003065 | Fail |
| 209 | 22.74  |        |        |      | 0     | 0.000000 | Fail        | 36.70 | 0.000062 | Fail |        |          |      |
| 210 | 24.44  |        |        |      | 0     | 0.000000 | Fail        | 0     | 0.000000 | Fail |        |          |      |
| 211 | 23.65  |        |        |      | 0     | 0.000000 | Fail        | 34.59 | 0.000509 | Fail |        |          |      |
| 212 | 22.43  |        |        |      | 0     | 0.000000 | Fail        | 38.10 | 0.000019 | Fail |        |          |      |
| 213 | 24.58  |        |        |      | 0     | 0.000000 | Fail        | 0     | 0.000000 | Fail |        |          |      |
| 214 | 21.99  |        |        |      | 0     | 0.000000 | Fail        | 37.41 | 0.000023 | Fail |        |          |      |

|     |        |        |        |      |       |          |             |       |          |      |        |          |      |
|-----|--------|--------|--------|------|-------|----------|-------------|-------|----------|------|--------|----------|------|
| 215 | 26.50  |        |        |      | 0     | 0.000000 | Fail        | 37.52 | 0.000482 | Fail |        |          |      |
| 216 | 21.90  |        |        |      | 0     | 0.000000 | Fail        | 35.43 | 0.000084 | Fail |        |          |      |
| 217 | 25.07  | 34.13  | 0.0019 | Fail | 0.00  | 0.000000 | Fail        | 0     | 0.000000 | Fail | 30.75  | 0.019438 | Fail |
| 218 | 22.56  |        |        |      | 0     | 0.000000 | Fail        |       |          |      |        |          |      |
| 219 | 28.06  | 34.70  | 0.0100 | Fail | 0.00  | 0.000000 | Fail        | 0     | 0.000000 | Fail | 31.96  | 0.066754 | Fail |
| 220 | 23.35  |        |        |      | 0     | 0.000000 | Fail        | 37.44 | 0.000057 | Fail |        |          |      |
| 221 | 22.22  |        |        |      | 0     | 0.000000 | Fail        | 37.08 | 0.000034 | Fail |        |          |      |
| 222 |        |        |        |      |       |          |             |       |          |      |        |          |      |
| 223 | 23.49  |        |        |      | 0     | 0.000000 | Fail        | 36.97 | 0.000087 | Fail |        |          |      |
| 224 | 22.84  |        |        |      | 0     | 0.000000 | Fail        | 37.25 | 0.000046 | Fail |        |          |      |
| 225 | 23.81  |        |        |      | 0     | 0.000000 | Fail        | 0     | 0.000000 | Fail |        |          |      |
| 226 |        |        |        |      |       |          |             |       |          |      |        |          |      |
| 227 | 28.13  |        |        |      | 0     | 0.000000 | Fail        | 0     | 0.000000 | Fail |        |          |      |
| 228 | 24.10  |        |        |      | 0     | 0.000000 | Fail        | 39.85 | 0.000018 | Fail |        |          |      |
| 229 | 22.485 | 32.05  | 0.0013 | Fail | 0     | 0.000000 | Fail        | 37.51 | 0.000030 | Fail | 31.24  | 0.002315 | Fail |
| 230 | 23.79  |        |        |      | 0     | 0.000000 | Fail        | 36.36 | 0.000164 | Fail |        |          |      |
| 231 | 23.77  | 32.095 | 0.0031 | Fail | 0     | 0.000000 | Fail        |       |          |      | 30.515 | 0.009323 | Fail |
| 232 | 23.57  |        |        |      | 0     | 0.000000 | Fail        | 37.61 | 0.000059 | Fail |        |          |      |
| 233 | 23.05  |        |        |      | 0     | 0.000000 | Fail        | 36.27 | 0.000105 | Fail |        |          |      |
| 234 |        |        |        |      |       |          |             |       |          |      |        |          |      |
| 235 |        |        |        |      |       |          |             |       |          |      |        |          |      |
| 236 |        |        |        |      |       |          |             |       |          |      |        |          |      |
| 237 | 24.65  |        |        |      | 0     | 0.000000 | Fail        | 36.84 | 0.000214 | Fail |        |          |      |
| 238 | 23.39  |        |        |      | 0     | 0.000000 | Fail        | 36.08 | 0.000151 | Fail |        |          |      |
| 239 | 23.26  |        |        |      | 0     | 0.000000 | Fail        | 0     | 0.000000 | Fail |        |          |      |
| 240 | 21.79  |        |        |      | 0     | 0.000000 | Fail        | 34.08 | 0.000200 | Fail |        |          |      |
| 241 | 27.17  |        |        |      | 0     | 0.000000 | Fail        | 0     | 0.000000 | Fail |        |          |      |
| 242 | 25.24  |        |        |      | 0     | 0.000000 | Fail        | 0     | 0.000000 | Fail |        |          |      |
| 243 | 21.16  |        |        |      | 0     | 0.000000 | Fail        |       |          |      |        |          |      |
| 244 | 22.53  |        |        |      | 0     | 0.000000 | Fail        | 38.10 | 0.000021 | Fail |        |          |      |
| 245 | 23.63  |        |        |      | 40.31 | 0.000010 | <b>Pass</b> |       |          |      |        |          |      |



|     |        |        |        |      |       |          |             |        |          |      |        |          |      |
|-----|--------|--------|--------|------|-------|----------|-------------|--------|----------|------|--------|----------|------|
| 246 | 24.13  |        |        |      | 0     | 0.000000 | Fail        | 38.25  | 0.000056 | Fail |        |          |      |
| 247 | 25.58  | 36.09  | 0.0007 | Fail | 0.00  | 0.000000 | Fail        | 0      | 0.000000 | Fail | 32.63  | 0.007546 | Fail |
| 248 | 23.03  |        |        |      | 0     | 0.000000 | Fail        | 37.66  | 0.000040 | Fail |        |          |      |
| 249 | 24.55  | 32.195 | 0.0050 | Fail | 0     | 0.000000 | Fail        |        |          |      | 29.865 | 0.025120 | Fail |
| 250 | 24.90  |        |        |      | 0     | 0.000000 | Fail        | 0      | 0.000000 | Fail |        |          |      |
| 251 | 22.61  |        |        |      | 0     | 0.000000 | Fail        | 34.66  | 0.000235 | Fail |        |          |      |
| 252 | 22.93  | 31.60  | 0.0024 | Fail | 40.02 | 0.000007 | <b>Pass</b> |        |          |      | 28.93  | 0.015571 | Fail |
| 253 | 23.76  |        |        |      | 0     | 0.000000 | Fail        | 37.74  | 0.000062 | Fail |        |          |      |
| 254 | 23.65  |        |        |      | 0     | 0.000000 | Fail        |        |          |      |        |          |      |
| 255 | 28.26  |        |        |      | 0     | 0.000000 | Fail        | 0      | 0.000000 | Fail |        |          |      |
| 256 | 27.37  |        |        |      | 0     | 0.000000 | Fail        |        |          |      |        |          |      |
| 257 | 22.17  | 31.58  | 0.0015 | Fail | 0     | 0.000000 | Fail        | 36.795 | 0.000040 | Fail | 31.57  | 0.001480 | Fail |
| 258 | 22.53  |        |        |      | 40.98 | 0.000003 | <b>Pass</b> | 37.80  | 0.000025 | Fail |        |          |      |
| 259 | 22.60  |        |        |      | 0     | 0.000000 | Fail        | 36.92  | 0.000049 | Fail |        |          |      |
| 260 | 24.47  |        |        |      | 0     | 0.000000 | Fail        | 0      | 0.000000 | Fail |        |          |      |
| 261 | 23.28  |        |        |      | 0     | 0.000000 | Fail        | 37.23  | 0.000063 | Fail |        |          |      |
| 262 | 25.77  |        |        |      | 0     | 0.000000 | Fail        | 0      | 0.000000 | Fail |        |          |      |
| 263 | 23.645 | 32.905 | 0.0016 | Fail | 37.45 | 0.000070 | <b>Pass</b> | 38.925 | 0.000025 | Fail | 30.975 | 0.006215 | Fail |
| 264 | 22.71  |        |        |      | 0     | 0.000000 | Fail        | 36.84  | 0.000056 | Fail |        |          |      |
| 265 | 29.02  |        |        |      | 0     | 0.000000 | Fail        | 0      | 0.000000 | Fail |        |          |      |
| 266 | 22.285 | 31.44  | 0.0018 | Fail |       |          |             | 36.245 | 0.000063 | Fail | 29.945 | 0.004944 | Fail |
| 267 |        |        |        |      |       |          |             |        |          |      |        |          |      |
| 268 | 25.53  |        |        |      | 0     | 0.000000 | Fail        | 0      | 0.000000 | Fail |        |          |      |
| 269 | 25.54  |        |        |      | 0     | 0.000000 | Fail        | 37.31  | 0.000285 | Fail |        |          |      |
| 270 | 25.58  | 33.64  | 0.0037 | Fail | 0.00  | 0.000000 | Fail        | 0      | 0.000000 | Fail | 29.68  | 0.058517 | Fail |
| 271 | 24.46  |        |        |      | 0     | 0.000000 | Fail        | 38.73  | 0.000051 | Fail |        |          |      |
| 272 | 27.06  |        |        |      | 0.00  | 0.000000 | Fail        | 0      | 0.000000 | Fail | 31.92  | 0.034554 | Fail |
| 273 | 23.40  |        |        |      | 0     | 0.000000 | Fail        | 0      | 0.000000 | Fail |        |          |      |
| 274 | 23.12  |        |        |      | 0     | 0.000000 | Fail        | 0      | 0.000000 | Fail |        |          |      |
| 275 | 23.03  |        |        |      | 38.50 | 0.000022 | <b>Pass</b> | 36.70  | 0.000077 | Fail |        |          |      |
| 276 | 24.91  |        |        |      | 0     | 0.000000 | Fail        |        |          |      |        |          |      |

|     |       |       |        |      |      |          |      |       |          |      |       |          |      |
|-----|-------|-------|--------|------|------|----------|------|-------|----------|------|-------|----------|------|
| 277 | 23.23 |       |        |      | 0    | 0.000000 | Fail | 0     | 0.000000 | Fail |       |          |      |
| 278 | 22.53 |       |        |      | 0    | 0.000000 | Fail | 38.08 | 0.000021 | Fail |       |          |      |
| 279 | 32.40 |       |        |      | 0    | 0.000000 | Fail | 0     | 0.000000 | Fail |       |          |      |
| 280 | 23.42 | 31.67 | 0.0033 | Fail | 0.00 | 0.000000 | Fail |       |          |      | 28.85 | 0.023115 | Fail |
| 281 | 24.08 |       |        |      | 0    | 0.000000 | Fail |       |          |      |       |          |      |
| 282 | 24.51 |       |        |      | 0    | 0.000000 | Fail | 35.72 | 0.000421 | Fail |       |          |      |

---

**Table S6. Measured cytokines median levels (pg/ml)**

|             | <b>Median</b> | <b>Min.</b> | <b>Max.</b> | <b>Range</b> |
|-------------|---------------|-------------|-------------|--------------|
| TGF-β1      | 19144.41      | 3696.87     | 129499.59   | 125802.72    |
| TGF-β2      | 2096.89       | 809.1       | 4190.22     | 3381.12      |
| TGF-β3      | 662.13        | 35.55       | 1630.45     | 1594.9       |
| IFN-alpha2  | 99.21         | 43.39       | 176.41      | 133.02       |
| IL-1alpha   | 0.28          | 0.02        | 4.76        | 4.74         |
| IL-2Ralpha  | 71.38         | 21.2        | 149.43      | 128.23       |
| IL-3        | 38.18         | 1.35        | 145.37      | 144.02       |
| IL-12(p40)  | 80.57         | 0.55        | 2260.55     | 2260         |
| IL-16       | 337.91        | 147.57      | 1115.07     | 967.5        |
| IL-18       | 44.9          | 0.83        | 677.64      | 676.81       |
| CTACK       | 1321.14       | 289.08      | 3098.73     | 2809.65      |
| GRO-alpha   | 3.11          | 3.11        | 12.93       | 9.82         |
| HGF         | 275.77        | 81.34       | 6374.22     | 6292.88      |
| LIF         | 6.75          | 0.01        | 27.15       | 27.14        |
| MCP-3       | 52.49         | 0.57        | 197.19      | 196.62       |
| M-CSF       | 9.4           | 0.2         | 52.26       | 52.06        |
| MIF         | 275.5         | 73.29       | 2710.28     | 2636.99      |
| MIG         | 599.1         | 123.46      | 5497.58     | 5374.12      |
| Beta-NGF    | 0.95          | 0.04        | 20.4        | 20.36        |
| SCF         | 48.27         | 5.41        | 164.19      | 158.78       |
| SCGF-beta   | 16763.06      | 4385.21     | 77107.19    | 72721.98     |
| SDF-1alpha  | 219.53        | 18.7        | 637.26      | 618.56       |
| TNF-beta    | 0.37          | 0.04        | 2.83        | 2.79         |
| TRAIL       | 40.52         | 3.63        | 154.5       | 150.87       |
| IL-1beta    | 4.51          | 1.13        | 23.48       | 22.35        |
| Il-1r alpha | 224.81        | 41.12       | 13299.4     | 13258.28     |
| IL-2        | 27.89         | 1.91        | 1167.73     | 1165.82      |
| IL-4        | 7.47          | 1.76        | 29.95       | 28.19        |
| IL-5        | 8.96          | 2.29        | 39.91       | 37.62        |
| IL-6        | 18.63         | 2.32        | 935.24      | 932.92       |
| IL-7        | 11.9          | 1.58        | 144.64      | 143.06       |
| IL-8        | 32.98         | 5.49        | 268.96      | 263.47       |
| IL-9        | 21.24         | 4.66        | 136.04      | 131.38       |
| IL-10       | 7.28          | 1.53        | 578.6       | 577.07       |
| IL-12       | 24.4          | 0.94        | 1242.02     | 1241.08      |
| IL-13       | 9.13          | 1.35        | 618.78      | 617.43       |
| IL-15       | 17.09         | 1.43        | 81.2        | 79.77        |
| IL-17       | 71.15         | 7.54        | 625.09      | 617.55       |
| Eotaxin     | 420.99        | 38.73       | 1764.37     | 1725.64      |
| FGF         | 132.38        | 38.5        | 603.48      | 564.98       |
| G-CSF       | 46.71         | 2.47        | 296.96      | 294.49       |
| GM-CSF      | 59.2          | 15.92       | 317.88      | 301.96       |
| IFN-gamma   | 700.25        | 154.13      | 4180.03     | 4025.9       |
| IP-10       | 2775.31       | 944.55      | 16562.03    | 15617.48     |
| MCP-1       | 35.37         | 10.84       | 126.49      | 115.65       |
| MIP-1alpha  | 6.44          | 2.88        | 27.1        | 24.22        |
| MIP-1beta   | 67.9          | 24.86       | 677.76      | 652.9        |
| PDGF-BB     | 1023.85       | 25.77       | 9310.17     | 9284.4       |
| RANTES      | 6981.32       | 1184.95     | 29425.26    | 28240.31     |
| TNF-alpha   | 93.76         | 26.42       | 562.5       | 536.08       |
| VEGF        | 49.68         | 0.95        | 290.39      | 289.44       |
